# Supplementary material
Source: PubMed Central journal article supplement (PMC7362609)

**Figure S1.** Comparison of frequency of hand-to-head (all), -mouth, -eyes, -nose, and -other contacts between males and females stratified by age (adult, child) (contacts/hour)\*

\*Exact p-values were not computed due to ties

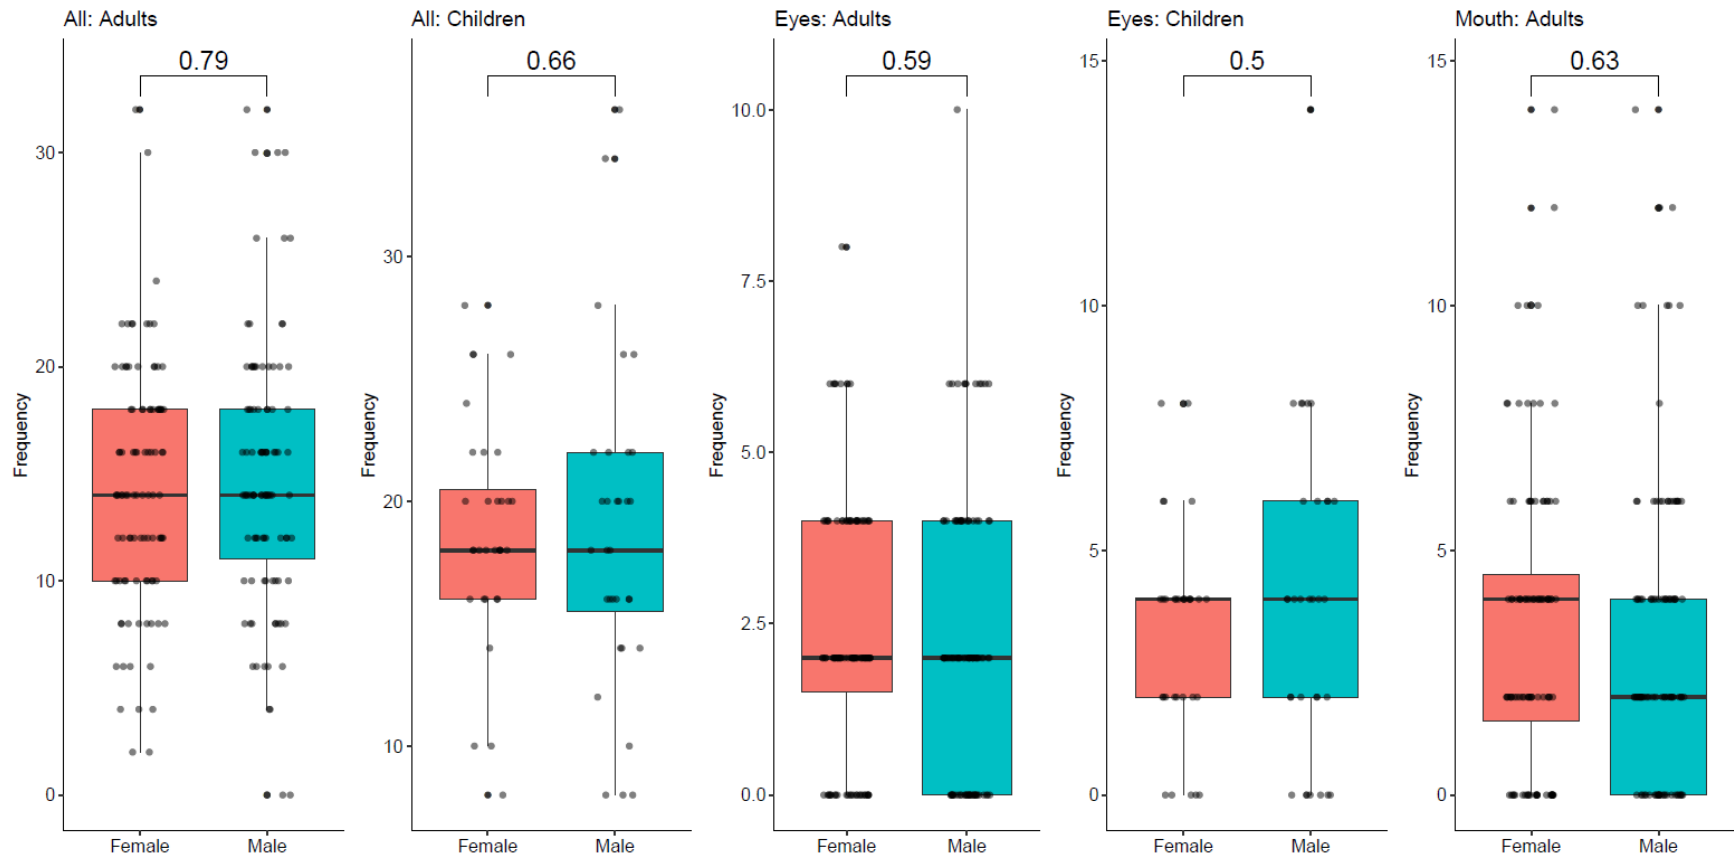

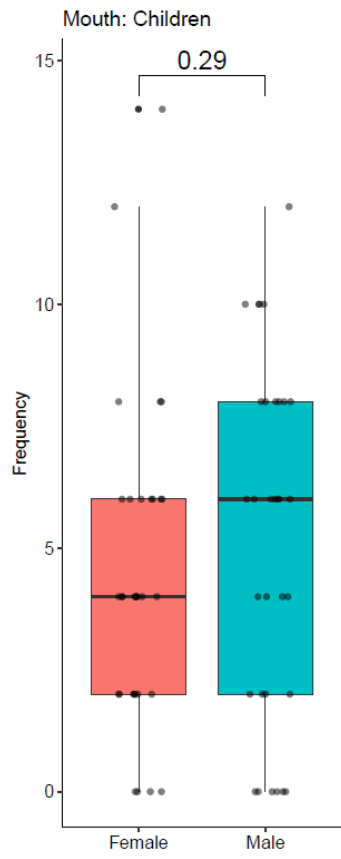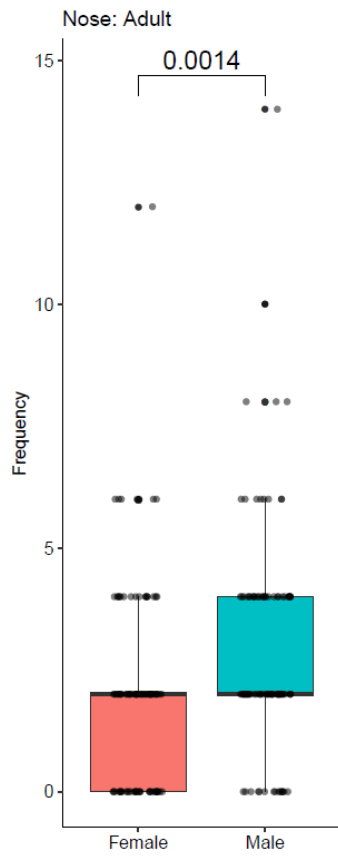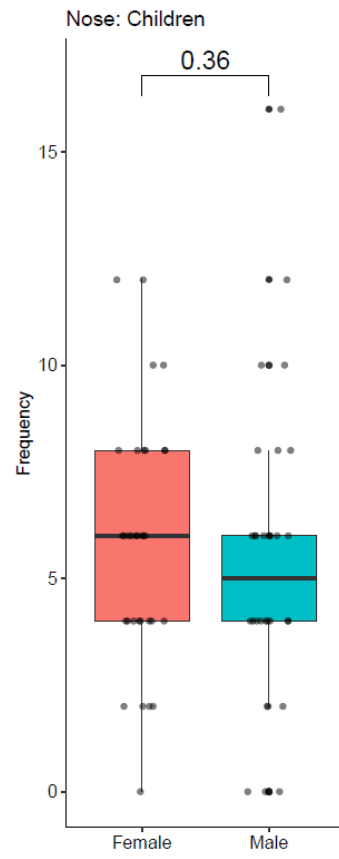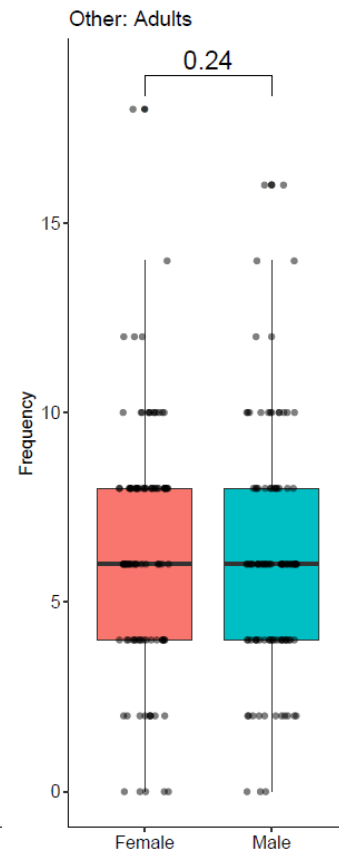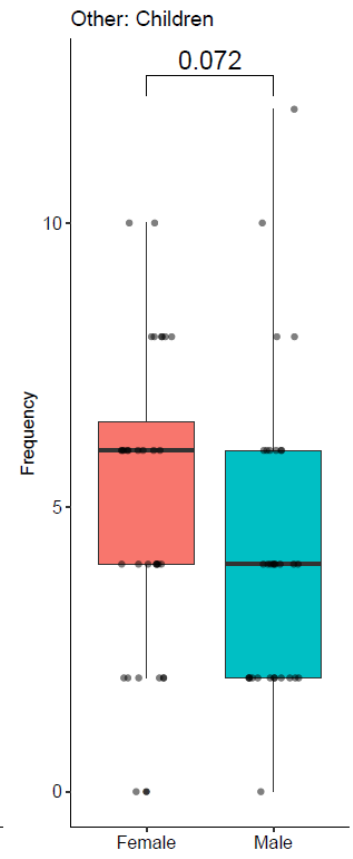

Supplement: 41370_2020_249_MOESM1_ESM.pdf [file 41370_2020_249_MOESM1_ESM.pdf]
