# Supplementary material
Source: PubMed Central journal article supplement (PMC7362609)

**Figure S2.** Comparison of contact frequency (contacts/hour) of hand-to-head (all), -mouth, -eyes, -nose, and -other contacts between adults and children stratified by eating vs. non-eating macro-activities\*

\*Exact p-values were not computed due to ties

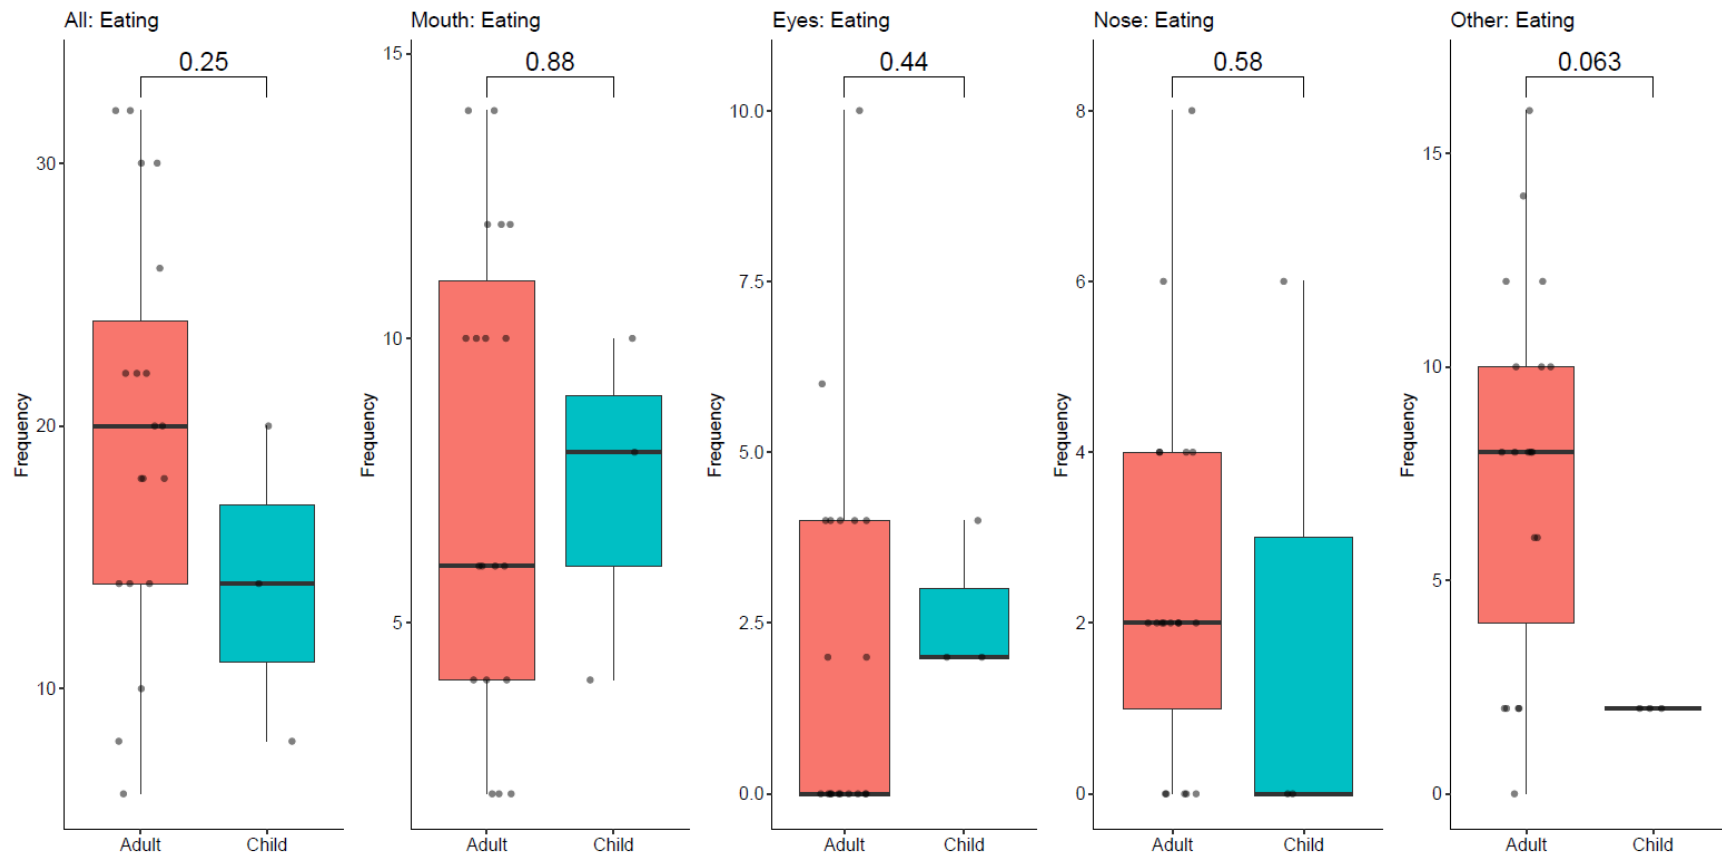

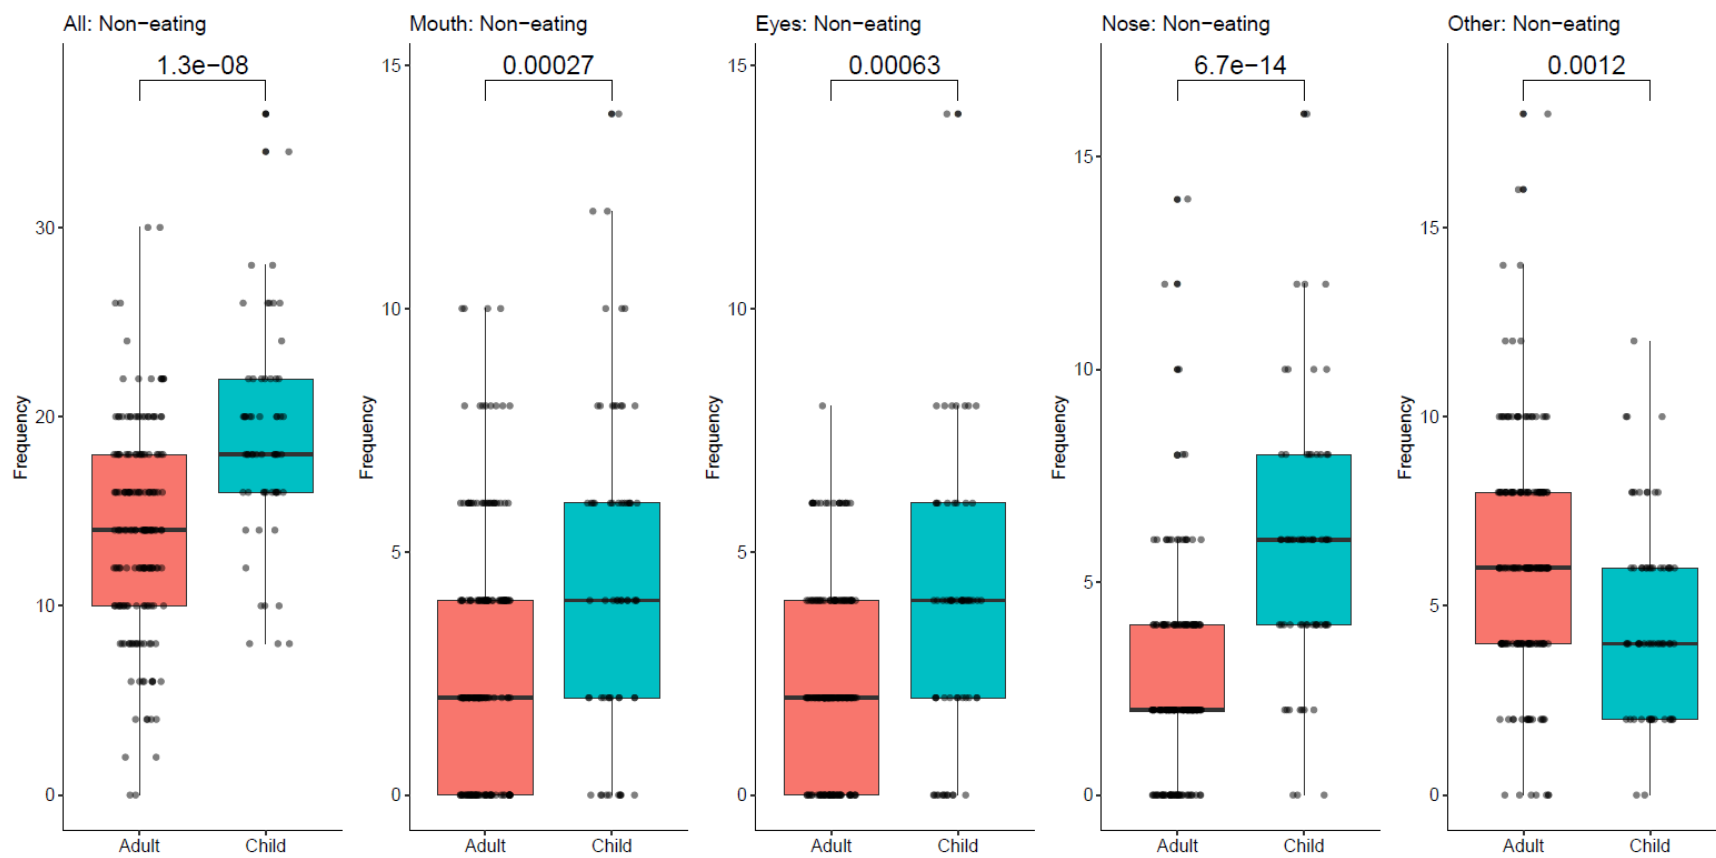

Supplement: 41370_2020_249_MOESM2_ESM.pdf [file 41370_2020_249_MOESM2_ESM.pdf]
