# Supplementary material
Source: PubMed Central journal article supplement (PMC7362609)

**Figure S3.** Comparisons of contact frequencies (contacts/hour) across locations for adults

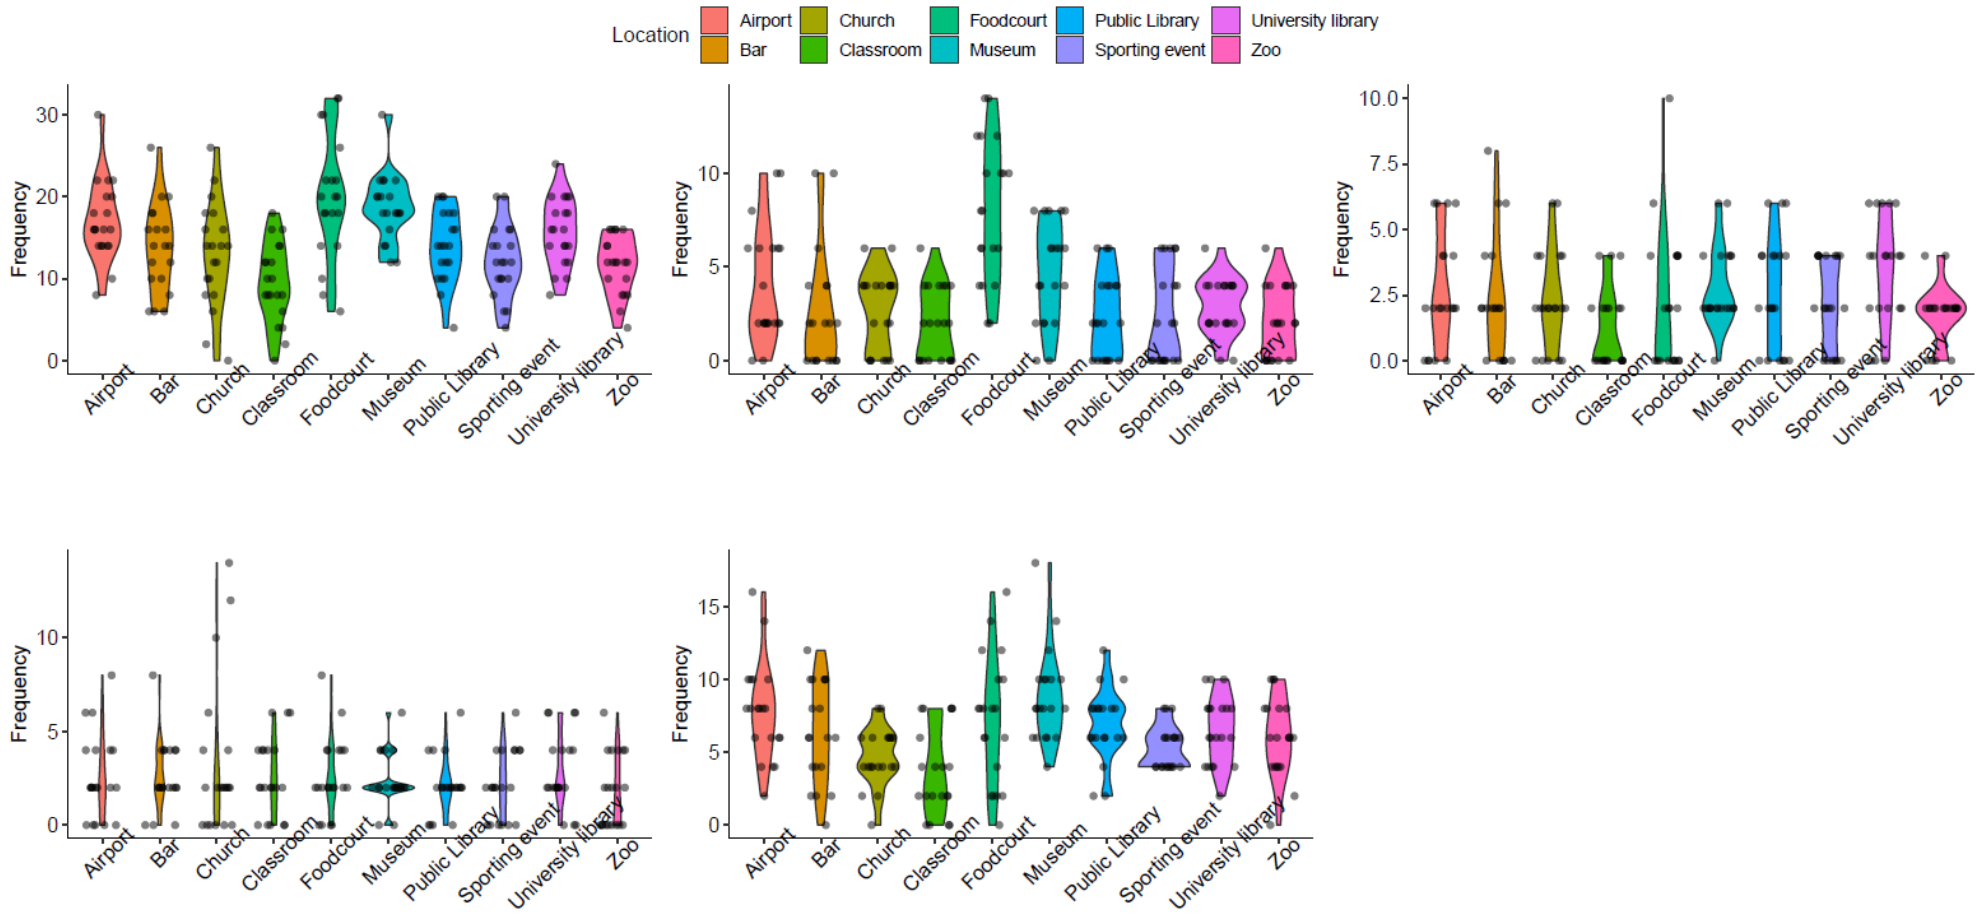

Supplement: 41370_2020_249_MOESM3_ESM.pdf [file 41370_2020_249_MOESM3_ESM.pdf]
